# Supplementary material for: Deciphering the complex interplay between microbiota, HPV, inflammation and cancer through cervicovaginal metabolic profiling
Source: PubMed Central journal article supplement — eBioMedicine. 2019 Apr 24;44:675–90. doi: 10.1016/j.ebiom.2019.04.028 (PMC6604110; doi:10.1016/j.ebiom.2019.04.028), 2019-04-24
Supplement: mmc3.pdf [file mmc3.pdf]

agmatine

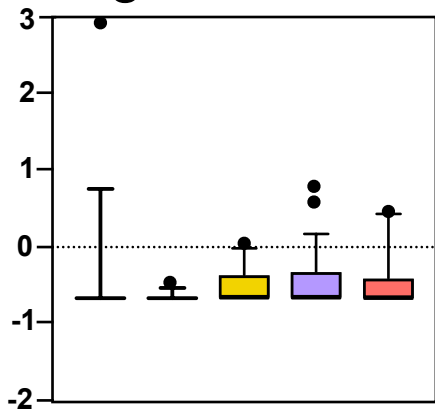

cadaverine

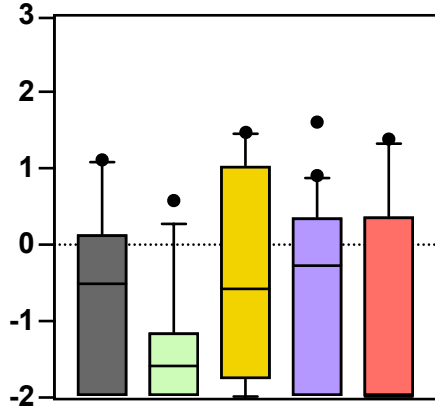

putrescine

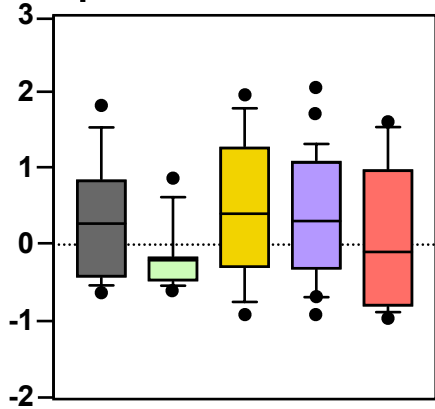

spermidine

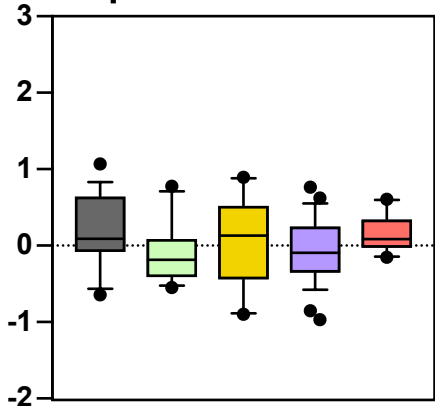

spermine

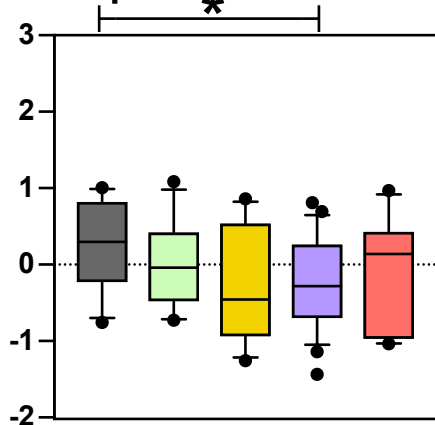

tryptamine

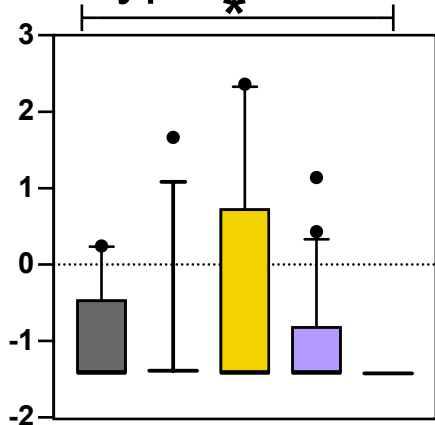

tyramine

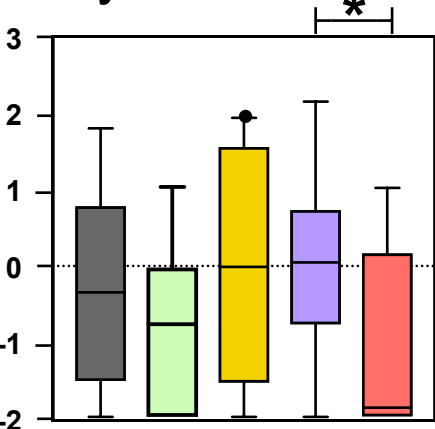

Ctrl HPV (-)
  Ctrl HPV (+)
  LSIL
  HSIL
  ICC
