# Supplementary material for: Deciphering the complex interplay between microbiota, HPV, inflammation and cancer through cervicovaginal metabolic profiling
Source: PubMed Central journal article supplement — eBioMedicine. 2019 Apr 24;44:675–90. doi: 10.1016/j.ebiom.2019.04.028 (PMC6604110; doi:10.1016/j.ebiom.2019.04.028), 2019-04-24
Supplement: mmc4.pdf [file mmc4.pdf]

# Metabolites correlated with inflammation vs *Lactobacillus* abundance (ICC patients excluded, n= 68)

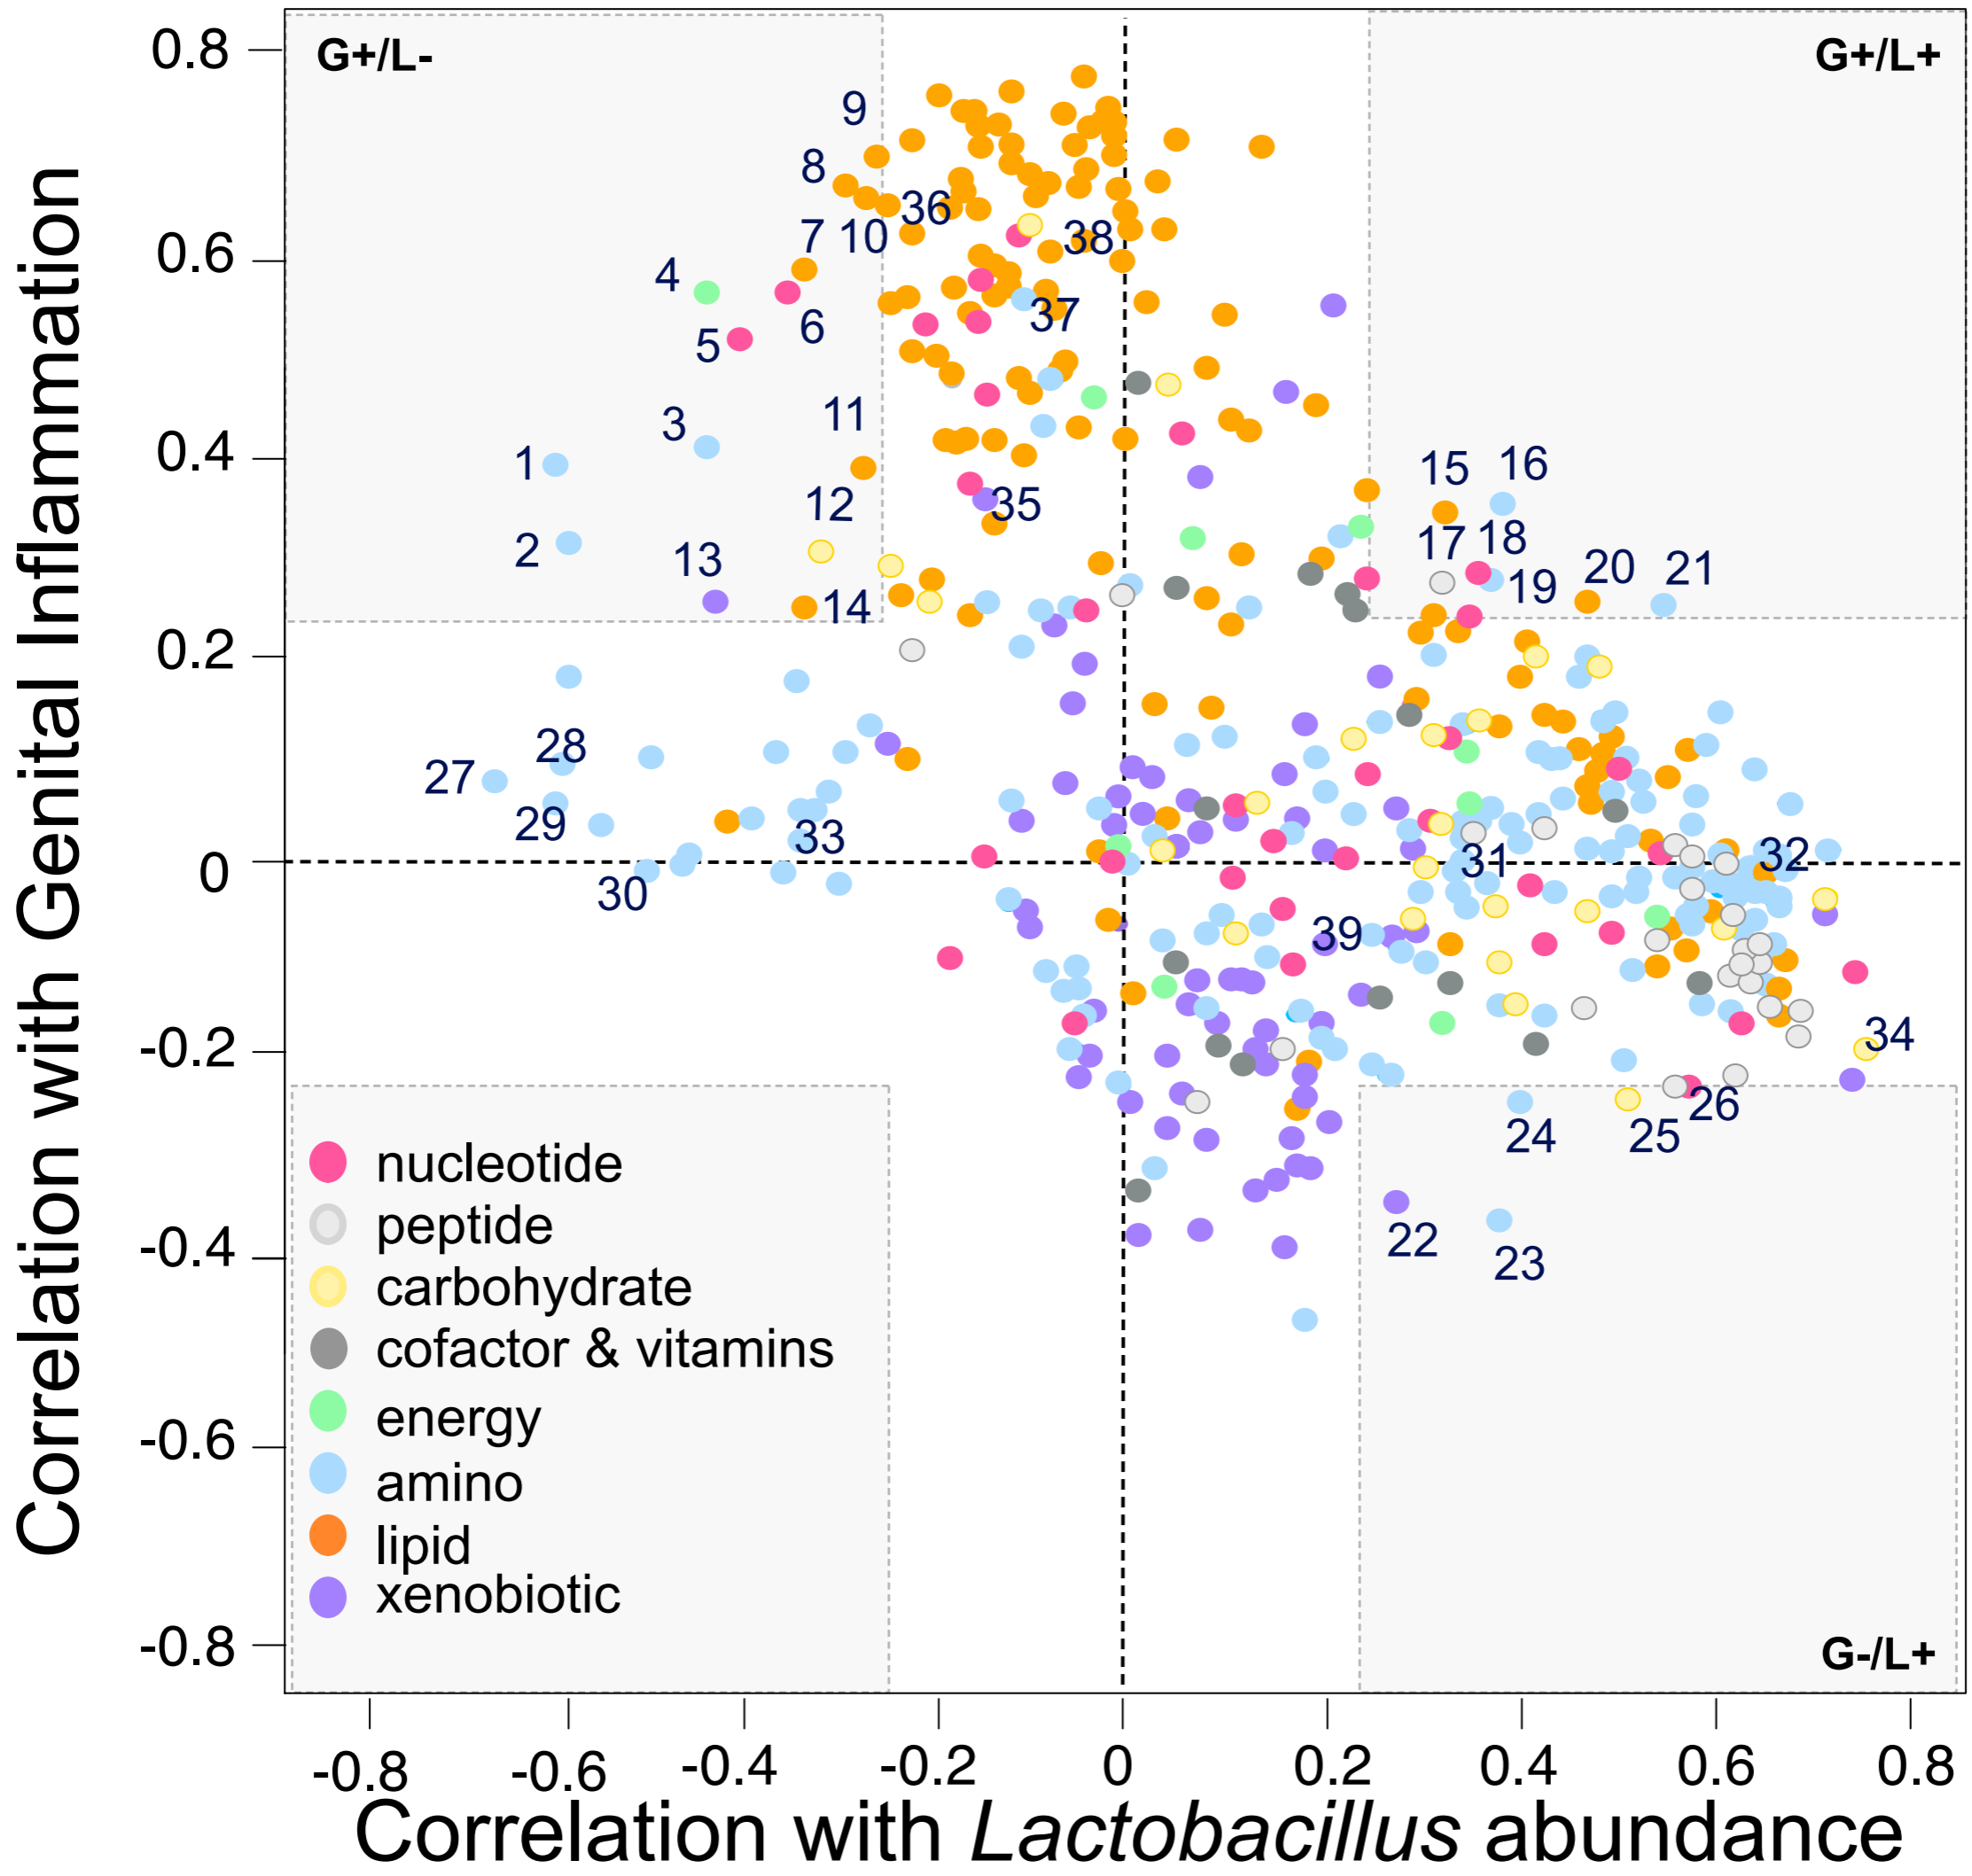

| G+/L-                               | G+/L+                            | Biogenic amines       |
|-------------------------------------|----------------------------------|-----------------------|
| 1. alpha-hydroxyvalerate            | 15.(S)-3-hydroxybutyrylcarnitine | 27. cadaverine        |
| 2. 2-hydroxy-3-methylvalerate       | 16. betaine                      | 28. putrescine        |
| 3. 2-hydroxybutyrate                | 17.leucylalanine                 | 29.tyramine           |
| 4.fumarate                          | 18.inosine                       | 30. tryptamine        |
| 5. cystidine 2' or 3' monophosphate | 19. hypotaurine                  | 31.spermidine         |
| 6. methylphosphate                  | 20. acetylcarnitine              | 32.spermine           |
| 7. 1-stearoyl-2-docosahexanoyl-GPC  | 21. N (1)-acetylspermine         | 33. agmatine          |
| 8. sphingomyelin                    |                                  |                       |
| 9. linoleate                        | G-/L+                            | Other metabolites     |
| 10.1-1enyl-palmitoyl-2-oleoyl-GPC   | 22. 1,2,3-benzenetriol sulfate   | 34. lactate           |
| 11. glycochenodeoxycholate          | 23.3-methylhistidine             | 35. 3-hydroxybutyrate |
| 12.3-4-hydroxyphenyl-propionate     | 24.creatinine                    | 36. eicosenoate       |
| 13. 3-(4-hydroxyphenyl)propionate   | 25.glucuronate                   | 37. oleate-vaccenate  |
| 14. deoxycarnitine                  | 26. valylglycine                 | 38. NAD +             |
|                                     |                                  | 39. hippurate         |
