# Supplementary figures and images for: Deciphering the complex interplay between microbiota, HPV, inflammation and cancer through cervicovaginal metabolic profiling
Source: PubMed Central journal article supplement — eBioMedicine. 2019 Apr 24;44:675–90. doi: 10.1016/j.ebiom.2019.04.028 (PMC6604110; doi:10.1016/j.ebiom.2019.04.028), 2019-04-24

### B) PCA of metabolites coloured based on BMI

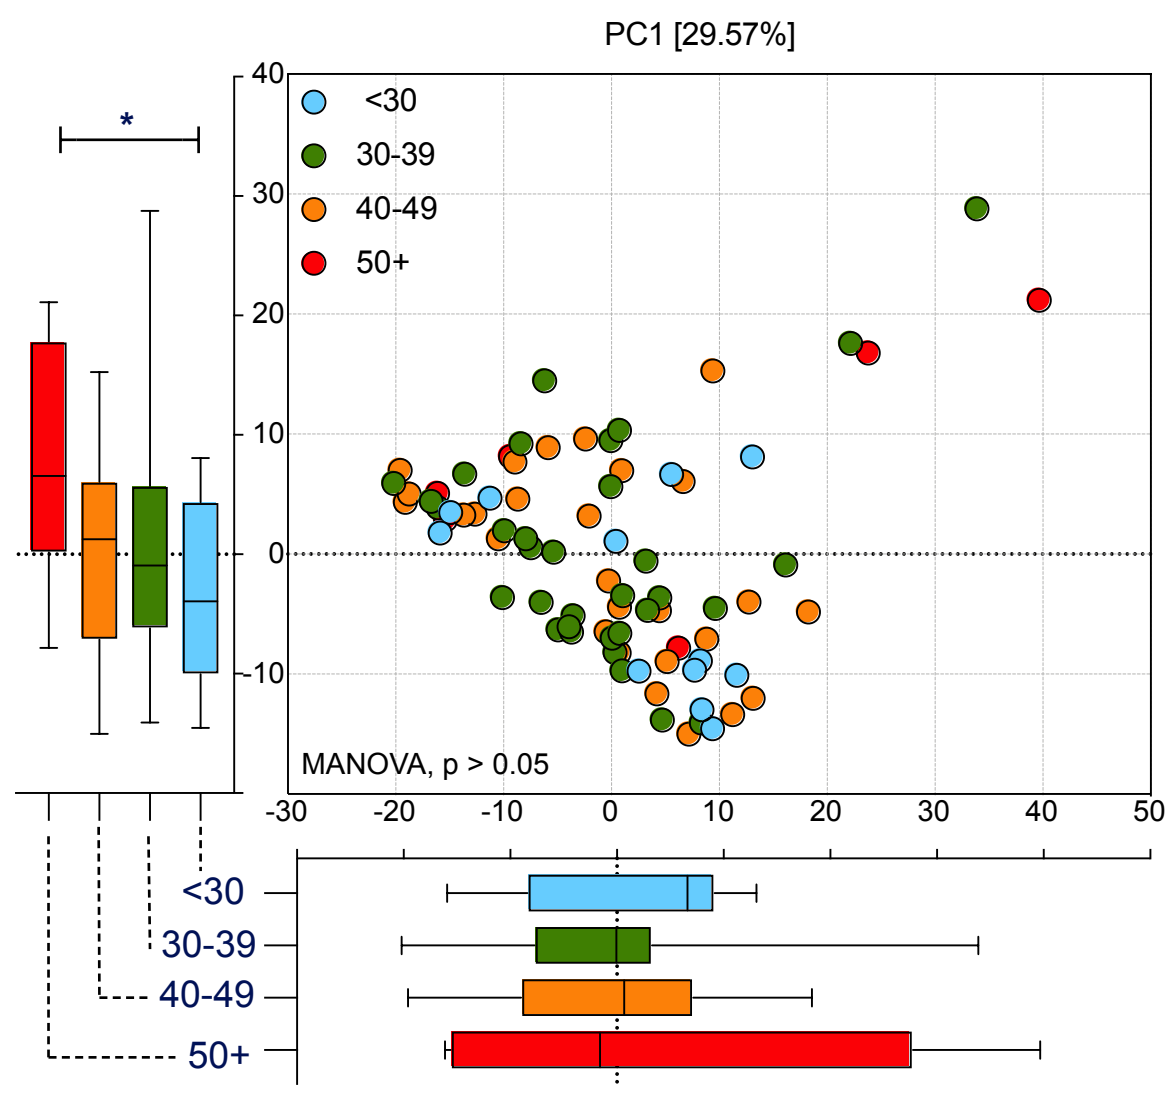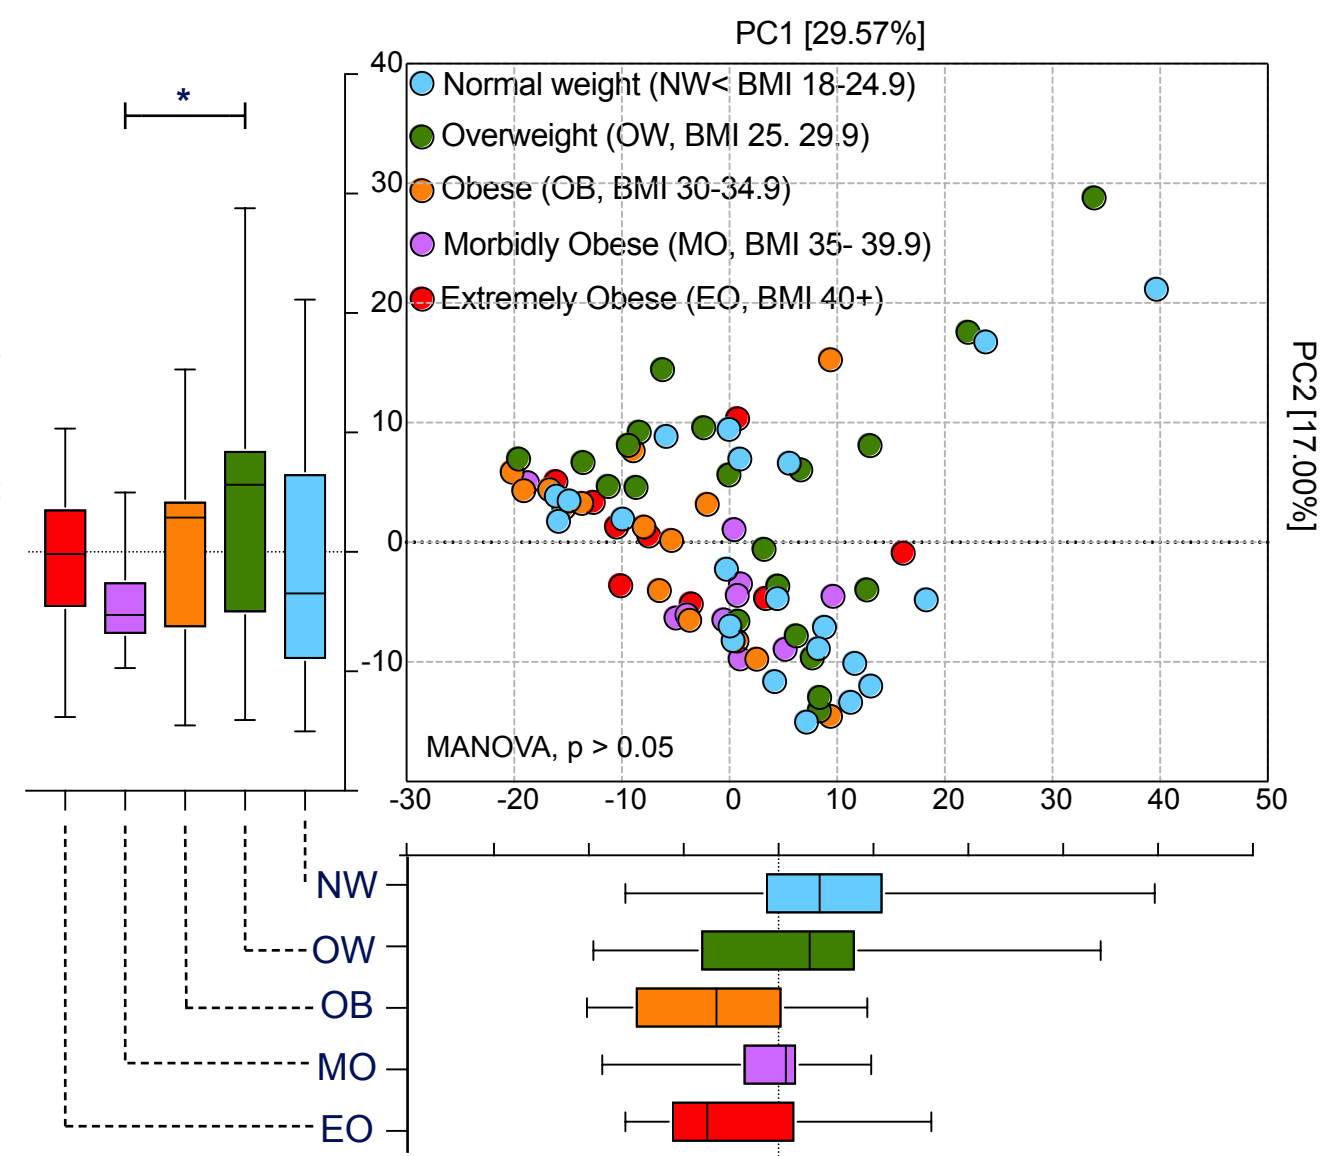

### C) PCA of metabolites coloured based on ethnicity

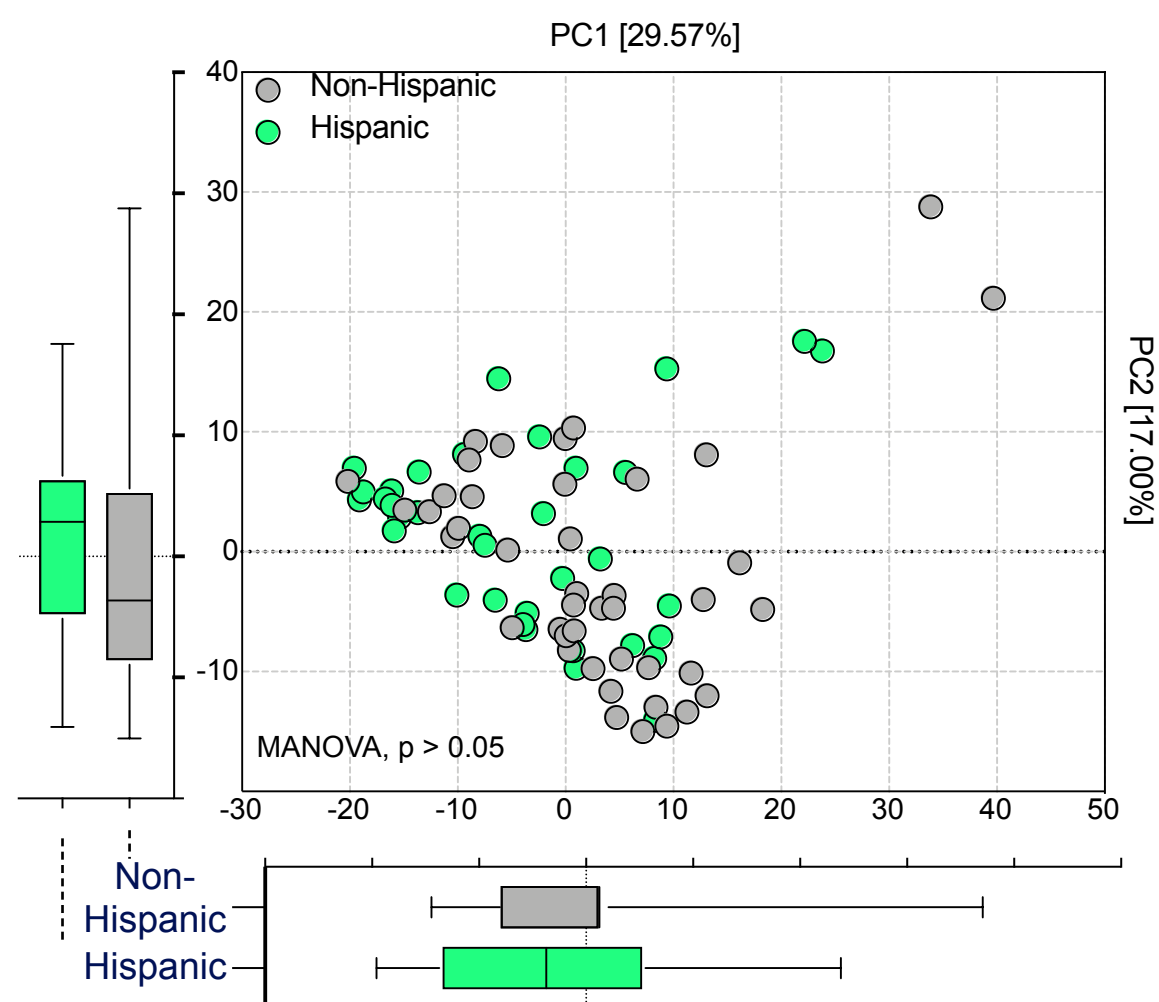

Supplement: mmc1.pdf [file mmc1.pdf]

# PCA of metabolites coloured based on vaginal pH

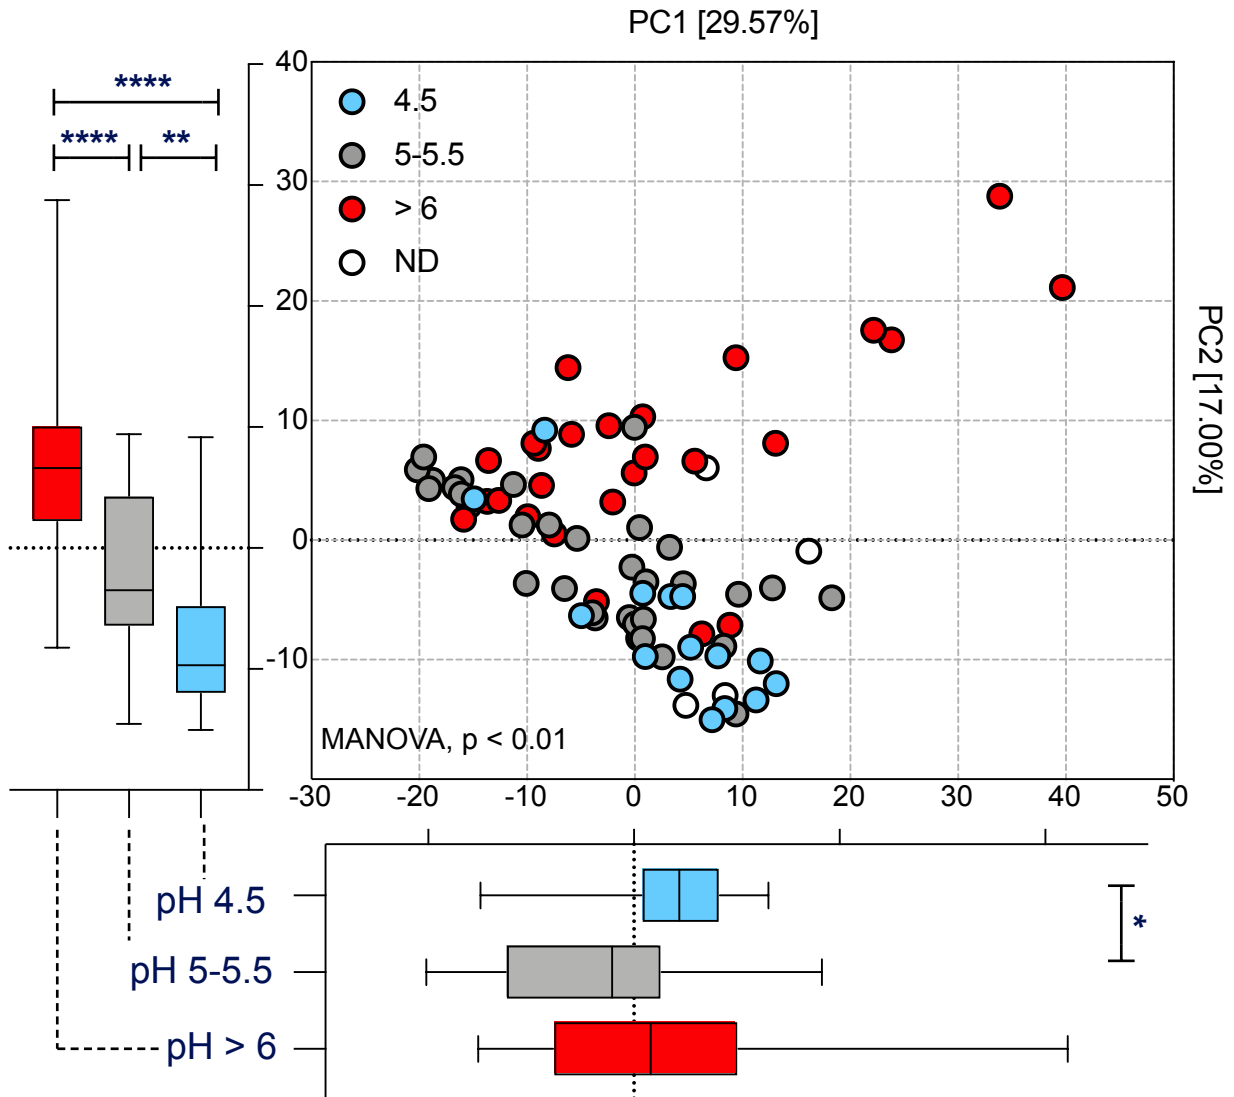

Supplement: mmc2.pdf [file mmc2.pdf]
